# Supplementary material
Source: PubMed Central journal article supplement (PMC6718199)

**A** Synthesized image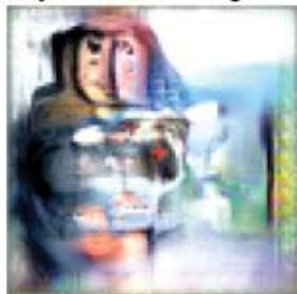**B** Top natural images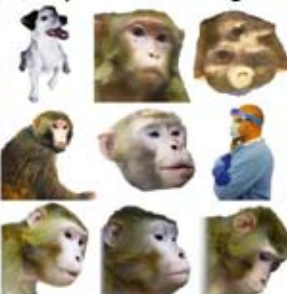**C** Closest images in fc6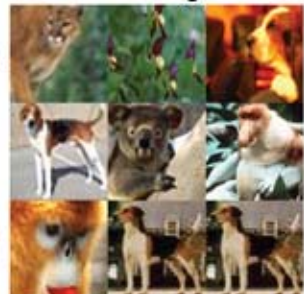**D** Common features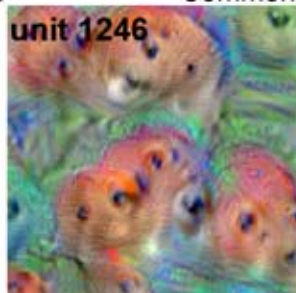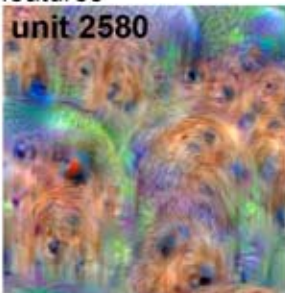**E** Farthest images in fc6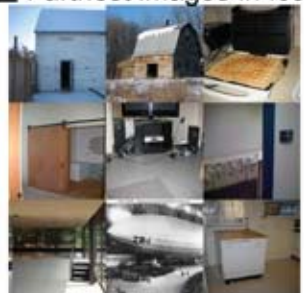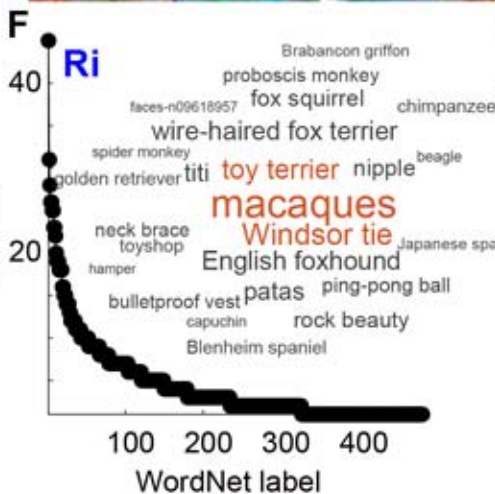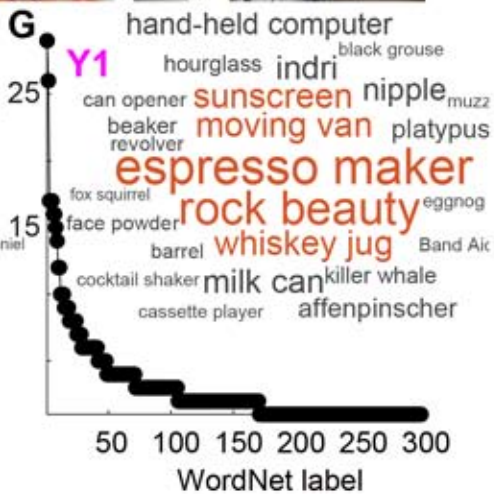

Supplement: NIHMS1527712-supplement-5.pdf [file NIHMS1527712-supplement-5.pdf]
