# Supplementary material
Source: PubMed Central journal article supplement (PMC6718199)
Supplement: NIHMS1527712-supplement-9.pdf [file NIHMS1527712-supplement-9.pdf]

## Supplementary Tables for

# **Evolving images for visual neurons using a deep generative network reveals coding principles and neuronal preferences**

**Authors:** Carlos R. Ponce, Will Xiao, Peter F. Schade, Till S. Hartmann, Gabriel Kreiman, and Margaret S. Livingstone

**Table S1. Response rate change of neurons during evolution of synthetic images, averaged across all experiments for each subject, based on fit to exponential function. Related to Figure 5A.**

| Synthetic images         |                                                     |                                    |                                                                                                     |                                                              |
|--------------------------|-----------------------------------------------------|------------------------------------|-----------------------------------------------------------------------------------------------------|--------------------------------------------------------------|
| Area                     | Median response change per evolution (spikes/s/gen) | 25 <sup>th</sup> , 75th percentile | # experiments with amplitude change different from zero (bootstrap test, 95% CI not including zero) | No. experiments using multiunits vs. single units<br>SU   MU |
| PIT (monkey Ri)          | 81.4                                                | 67.4, 110.5                        | 15/15                                                                                               | 7   8                                                        |
| PIT (monkey Gu)          | 24.6                                                | 17.8, 34.2                         | 4/4                                                                                                 | 0   4                                                        |
| P/CIT (monkey Ge)        | 38.2                                                | 32.8, 88.8                         | 8/9                                                                                                 | 6   3                                                        |
| CIT (monkey B3)          | 47.0                                                | 24.8, 77.0                         | 4/4                                                                                                 | 4   0                                                        |
| CIT (monkey Y1)          | 25.5                                                | 16.0, 39.5                         | 6/6                                                                                                 | 0   6                                                        |
| CIT (monkey Jo)          | 53.7                                                | 39.5, 61.2                         | 8/8                                                                                                 | 6   2                                                        |
| V1 (monkey Vi)           | 84.0                                                | 77.4, 91.2                         | 6/6                                                                                                 | 1   5                                                        |
| Natural images           |                                                     |                                    |                                                                                                     |                                                              |
| PIT (monkey Ri)          | -3.3                                                | -15.1, 4.8                         | 5/15                                                                                                |                                                              |
| PIT (monkey Gu)          | 8.7                                                 | 2.3, 18.2                          | 2/4                                                                                                 |                                                              |
| P/CIT (monkey Ge)        | -11.4                                               | -18.8, -1.3                        | 5/9                                                                                                 |                                                              |
| CIT (monkey B3)          | -10.4                                               | -14.7, 4.4                         | 1/4                                                                                                 |                                                              |
| CIT (monkey Y1)          | -8.8                                                | -12.2, -2.4                        | 0/6                                                                                                 |                                                              |
| CIT (monkey Jo)          | -1.6                                                | -10.6, -13.4                       | 2/8                                                                                                 |                                                              |
| V1 (monkey Vi, gratings) | -32.45                                              | -107.1, 43.1                       | 4/6                                                                                                 |                                                              |

**Table S2. Frequency that the closest ImageNet images to the evolved images had the following labels (mean frequency  $\pm$  se, per bootstrap). Related to Figures 7, S5 and section **Predicting neuronal responses to a novel image from its similarity to the evolved stimuli.****

|                                         | ImageNet labels                      |                                                                                            |                        |                                                                                        |
|-----------------------------------------|--------------------------------------|--------------------------------------------------------------------------------------------|------------------------|----------------------------------------------------------------------------------------|
|                                         | "macaque"                            | "monkey"                                                                                   | "face"<br>(human only) | "appliance"                                                                            |
| frequency of label in sampled image set | $9.97 \times 10^{-4}$                | $1.30 \times 10^{-2}$                                                                      | $5.99 \times 10^{-3}$  | $1.10 \times 10^{-2}$                                                                  |
| Monkey Ri                               | 0.021 $\pm$ 0.014<br>(mean $\pm$ SE) | 0.092 $\pm$ 0.030                                                                          | 0.001 $\pm$ 0.002      | 0.010 $\pm$ 0.009                                                                      |
| Monkey Ge                               | 0.007 $\pm$ 0.008                    | 0.033 $\pm$ 0.017                                                                          | 0.002 $\pm$ 0.005      | 0.013 $\pm$ 0.010                                                                      |
| Monkey B3                               | 0.008 $\pm$ 0.009                    | 0.048 $\pm$ 0.022                                                                          | 0.002 $\pm$ 0.005      | 0.015 $\pm$ 0.012                                                                      |
| Monkey Gu                               | 0.010 $\pm$ 0.010                    | 0.068 $\pm$ 0.025                                                                          | 0.000 $\pm$ 0.000      | 0.029 $\pm$ 0.016                                                                      |
| Monkey Y1                               | 0.002 $\pm$ 0.005                    | 0.041 $\pm$ 0.017                                                                          | 0.001 $\pm$ 0.003      | 0.041 $\pm$ 0.019                                                                      |
|                                         |                                      | Probability that the values in Ri and Y1 were the same under the null hypothesis:<br>0.070 |                        | Probability that values in Ri and Y1 were the same under the null hypothesis:<br>0.076 |

**Table S3. Response statistics for fc6-prediction experiments, comparing evolved images and top predictions. Related to Figure 7 and section **Predicting neuronal responses to a novel image from its similarity to the evolved stimuli.****

|                                                                                                                                                                                                                                                                                                                                                                                                                                                                 |                                                                                          |                                                                                |                                                                                                           | Linear regression between ordinal prediction distance and mean neuronal response |                                                                         |
|-----------------------------------------------------------------------------------------------------------------------------------------------------------------------------------------------------------------------------------------------------------------------------------------------------------------------------------------------------------------------------------------------------------------------------------------------------------------|------------------------------------------------------------------------------------------|--------------------------------------------------------------------------------|-----------------------------------------------------------------------------------------------------------|----------------------------------------------------------------------------------|-------------------------------------------------------------------------|
| Subject                                                                                                                                                                                                                                                                                                                                                                                                                                                         | Evolved images (mean response in spikes/s, across all experiments)                       | Top predictions (response to closest fc6 neighbors)                            | <i>P</i> value range across experiments (Wilcoxon rank sum test for equal medians, synthetic vs. natural) | Slope values (spikes/s per prediction group, t-test <i>P</i> value)              | Range of slope values per experiment per animal, t-test <i>P</i> values |
| Ri                                                                                                                                                                                                                                                                                                                                                                                                                                                              | 59.4±1.4, N=4                                                                            | 30.8±1.3                                                                       | 4.5 x 10 <sup>-144</sup> to 3.5 x 10 <sup>-8</sup>                                                        | -21.1<br>< 1x10 <sup>-6</sup>                                                    | -25.3 to -4.9<br>1 x 10 <sup>-6</sup> to 7.9 x 10 <sup>-7</sup>         |
| Gu                                                                                                                                                                                                                                                                                                                                                                                                                                                              | 38.5±0.8<br>N = 3                                                                        | 26.3±1.4                                                                       | 5.8 x 10 <sup>-309</sup> to 5.1 x 10 <sup>-2</sup>                                                        | -5.9<br>4.3 x 10 <sup>-114</sup>                                                 | -15.1 to 2.2<br>1 x 10 <sup>-6</sup> to 8.2 x 10 <sup>-2</sup>          |
| Y1                                                                                                                                                                                                                                                                                                                                                                                                                                                              | 38.3±1.1<br>N = 3                                                                        | 21.4±2.2                                                                       | 8.7 x 10 <sup>-23</sup> to 1.0 x 10 <sup>-2</sup>                                                         | -5.7<br>1.4 x 10 <sup>-16</sup>                                                  | -12.0 to -1.8<br>1.4 x 10 <sup>-16</sup> to 5.0 x 10 <sup>-2</sup>      |
| <p>Relationship between distance in fc6 space and mean response <i>per image</i><br/>                     For every site, we computed the fc6 distance between each site's evolved image and a sample of natural images, and compared those distance values with the same sites' mean response to the images. We also measured the trial-by-trial variability of the sites to the images (variability estimated by correlation across a random bipartition)</p> |                                                                                          |                                                                                |                                                                                                           |                                                                                  |                                                                         |
|                                                                                                                                                                                                                                                                                                                                                                                                                                                                 | Distance-response correlation (Pearson);<br><br>Each value corresponds to one experiment | <i>P</i> -values (under null hypothesis of zero correlation, Students' T-test) | Trial-by-trial correlation (Pearson)                                                                      | <i>P</i> -value (under null hypothesis of zero correlation, Students' T-test)    |                                                                         |
| Ri                                                                                                                                                                                                                                                                                                                                                                                                                                                              | 0.66,0.71, 0.51,0.55                                                                     | < 1.2x10 <sup>-3</sup>                                                         | 0.83, 0.66, 0.57, 0.56                                                                                    | ≤ 1.4x10 <sup>-3</sup>                                                           |                                                                         |
| Gu                                                                                                                                                                                                                                                                                                                                                                                                                                                              | -0.27,0.40,0.65                                                                          | 0.16, 1x10 <sup>-4</sup> , 0.03                                                | 0.84, 0.72, 0.90                                                                                          | ≤ 8x10 <sup>-6</sup>                                                             |                                                                         |
| Y1                                                                                                                                                                                                                                                                                                                                                                                                                                                              | 0.26, 0.77, 0.06                                                                         | 0.17,8x10 <sup>-7</sup> , 0.75                                                 | 0.68, 0.66,0.83                                                                                           | ≤ 3x10 <sup>-5</sup>                                                             |                                                                         |

**Table S4. (a) Response statistics for synthetic and natural images during evolution experiments (non-parametric), comparing mean and maximum responses reached during the experiment. Related to Figure 5B and section **Testing XDREAM using the ground truth of primary visual cortex.****

| Subject (area)                                                                                                                             | Mean (spikes/ s, $\pm$ sem)                           |                                   |                                                     | Max (spikes/s, $\pm$ se)                                |                                |                                                         |
|--------------------------------------------------------------------------------------------------------------------------------------------|-------------------------------------------------------|-----------------------------------|-----------------------------------------------------|---------------------------------------------------------|--------------------------------|---------------------------------------------------------|
|                                                                                                                                            | Synthetic                                             | Reference (natural)               | $P < 0.03$ ; Wilcoxon rank sum test, FDR correction | Synthetic                                               | Reference (natural)            | $P < 0.03$ ; randomization test, with FDR correction    |
| Ri (PIT)                                                                                                                                   | 90.5 $\pm$ 0.6                                        | 45.1 $\pm$ 0.6                    | 15 of 15                                            | 279.0 $\pm$ 8.6                                         | 236.6 $\pm$ 8.6                | 9 of 15<br>Synthetic larger than reference in 9/9 cases |
| Gu (PIT)                                                                                                                                   | 26.6 $\pm$ 0.4                                        | 21.3 $\pm$ 0.4                    | 3 of 4                                              | 122.4 $\pm$ 4.1                                         | 121.4 $\pm$ 4.6                | 0 of 4                                                  |
| Ge (P/CIT)                                                                                                                                 | 66.9 $\pm$ 0.5                                        | 15.1 $\pm$ 0.5                    | 8 of 9                                              | 220.3 $\pm$ 7.1                                         | 209.3 $\pm$ 8.5                | 5 of 9<br>Synthetic > reference in 4/5 cases            |
| B3 (CIT)                                                                                                                                   | 45.0 $\pm$ 0.4                                        | 5.9 $\pm$ 0.3                     | 4 of 4                                              | 213.1 $\pm$ 4.9                                         | 169.9 $\pm$ 18.2               | 3 of 4<br>Synthetic > reference in 3/3 cases            |
| Y1 (CIT)                                                                                                                                   | 34.0 $\pm$ 0.4                                        | 14.5 $\pm$ 0.4                    | 6 of 6                                              | 156.4 $\pm$ 8.9                                         | 146.3 $\pm$ 6.7                | 1 of 6,<br>Synthetic > reference                        |
| Jo (CIT)                                                                                                                                   | 57.6 $\pm$ 0.5                                        | 11.0 $\pm$ 0.5                    | 8 of 8                                              | 180.6 $\pm$ 4.9                                         | 117.2 $\pm$ 7.2                | 7 of 8,<br>Synthetic > reference in 7/7 cases           |
| Total number of IT experiments: 46                                                                                                         |                                                       |                                   |                                                     |                                                         |                                |                                                         |
| Vi (V1)                                                                                                                                    | 184.5 $\pm$ 1.8                                       | 114.5 $\pm$ 1.8                   | 6 of 6                                              | 416.1 $\pm$ 14.5                                        | (gratings)<br>390.3 $\pm$ 13.0 | P values: 0.003, 0.003, 0.012, 0.050, 0.347 and 0.398   |
| <b>S4 (b). Response statistics for experiments testing previously-evolved synthetic images and <math>\geq</math> 2,550 natural images.</b> |                                                       |                                   |                                                     |                                                         |                                |                                                         |
| Mean and maximum rates                                                                                                                     |                                                       |                                   |                                                     |                                                         |                                |                                                         |
| Subject                                                                                                                                    | Natural (mean $\pm$ sem, max $\pm$ se, per bootstrap) | Synthetic                         |                                                     | P value Wilcoxon rank sum test + permutation test (max) |                                |                                                         |
| Ri                                                                                                                                         | 24.7 $\pm$ 0.5<br>104.2 $\pm$ 1.4                     | 72.3 $\pm$ 1.9<br>130.3 $\pm$ 5.8 |                                                     | <1 x 10 <sup>-6</sup><br>1.0 x 10 <sup>-3</sup>         |                                |                                                         |
| Ge                                                                                                                                         | -8.4, 87.0 $\pm$ 3.8                                  | 28.0,<br>83.5 $\pm$ 4.4           |                                                     | <1 x 10 <sup>-6</sup><br>1.0 x 10 <sup>-3</sup>         |                                |                                                         |

**Table S5: Quantification of the goodness of fit by the substitute network. Related to Figure 7 and last paragraph of Discussion.**

| Unit Ri-10                             | Train              | Test           | Train                 | Val                   | Test            |
|----------------------------------------|--------------------|----------------|-----------------------|-----------------------|-----------------|
| Fit to CaffeNet fc6                    | all natural images | evolved images | 50% of natural images | 50% of natural images | evolved images  |
|                                        | n=2458             | n=244          | n=1229                | n=1229                | n=244           |
| Corr. coef.                            | 0.79               | 0.68           | $0.82 \pm 0.01$       | $0.74 \pm 0.01$       | $0.68 \pm 0.02$ |
| Mean abs. residual (spks/s)            | 21.4               | 55.9           | $23.3 \pm 1.6$        | $23.0 \pm 1.6$        | $56.3 \pm 2.1$  |
| Slope (orthogonal distance regression) | 1.34               | 8.00           | $1.30 \pm 0.03$       | $1.31 \pm 0.03$       | $7.52 \pm 0.80$ |

| Unit Ge-7                              | Train              | Test           | Train                 | Val                   | Test              |
|----------------------------------------|--------------------|----------------|-----------------------|-----------------------|-------------------|
| Fit to CaffeNet fc6                    | all natural images | evolved images | 50% of natural images | 50% of natural images | evolved images    |
|                                        | n=2551             | n=179          | n=1276                | n=1275                | n=179             |
| Corr. coef.                            | 0.80               | 0.18           | $0.85 \pm 0.01$       | $0.68 \pm 0.01$       | $0.20 \pm 0.15$   |
| Mean abs. residual (spks/s)            | 10.8               | 24.1           | $12.6 \pm 1.4$        | $12.6 \pm 1.3$        | $25.6 \pm 2.3$    |
| Slope (orthogonal distance regression) | 1.31               | 34.64          | $1.29 \pm 0.04$       | $1.28 \pm 0.05$       | $37.70 \pm 49.44$ |

**Table S6. Comparison of approaches. Related to Figure 2 and last paragraph of Discussion.**

Firing rate responses of two PIT units to images generated by three alternative methods: 1) real-time genetic algorithm with neurons combined with a deep generative network ('XDREAM'), 2) data-fitted substitute ConvNet combined with backpropagation directly to pixel space, and 3) substitute ConvNet combined with backpropagation to input space of the generative network (Nguyen et al., 2016).

|                                                                     | <b>XDREAM</b><br>(genetic algorithm + generative network)                                                                                           | <b>Substitute network optimization</b><br>(directly in pixel space, with jitter-robustness technique) | <b>Substitute network optimization</b> (in input space of generative network)         | <b>Probability of medians coming from the same distribution</b><br>(Kruskal-Wallis test, $\chi^2$ , DF) |
|---------------------------------------------------------------------|-----------------------------------------------------------------------------------------------------------------------------------------------------|-------------------------------------------------------------------------------------------------------|---------------------------------------------------------------------------------------|---------------------------------------------------------------------------------------------------------|
| <b>Multi-unit</b>                                                   | Median firing rate $\pm$ SE (per bootstrap, $N_{boot} = 1000$ ) measured within a 50-200 ms window minus 1-40 ms baseline (N = image presentations) |                                                                                                       |                                                                                       |                                                                                                         |
| Ri-10                                                               | 225.8 $\pm$ 2.3<br>(N = 1747)                                                                                                                       | 152.2 $\pm$ 2.1<br>(N = 1741)                                                                         | 178.2 $\pm$ 1.9<br>(N = 3504)                                                         | < 0.001, 1550, 2                                                                                        |
| Ri-12                                                               | 107.7 $\pm$ 1.2<br>(N = 1763)                                                                                                                       | 81.4 $\pm$ 1.0<br>(N = 1741)                                                                          | 93.1 $\pm$ 1.3<br>(N = 3516)                                                          | < 0.001, 753, 2                                                                                         |
| <u>Pairwise comparisons</u><br>(P-value per Wilcoxon rank sum test) |                                                                                                                                                     |                                                                                                       |                                                                                       |                                                                                                         |
|                                                                     | <b>XDREAM vs substitute network optimization in pixel space</b>                                                                                     | <b>Substitute network optimization in pixel space, without vs with jitter</b>                         | <b>XDREAM vs substitute network optimization in input space of generative network</b> |                                                                                                         |
| Ri-10                                                               | 225.8 $\pm$ 2.3 vs.<br>152.2 $\pm$ 2.1<br>$P < 0.001$                                                                                               | 106.6 $\pm$ 2.1 (N = 1774) vs.<br>152.2 $\pm$ 2.1<br>$P < 0.001$                                      | 225.8 $\pm$ 2.3 vs.<br>178.2 $\pm$ 1.9<br>$P < 0.001$                                 |                                                                                                         |
| Ri-12                                                               | 107.7 $\pm$ 1.2 vs.<br>81.4 $\pm$ 1.0<br>$P < 0.001$                                                                                                | 60.4 $\pm$ 1.4 (N = 1770) vs.<br>81.4 $\pm$ 1.0<br>$P < 0.001$                                        | 107.7 $\pm$ 1.2 vs.<br>93.1 $\pm$ 1.3<br>$P < 0.001$                                  |                                                                                                         |
