# Supplementary material
Source: PubMed Central journal article supplement (PMC6718199)

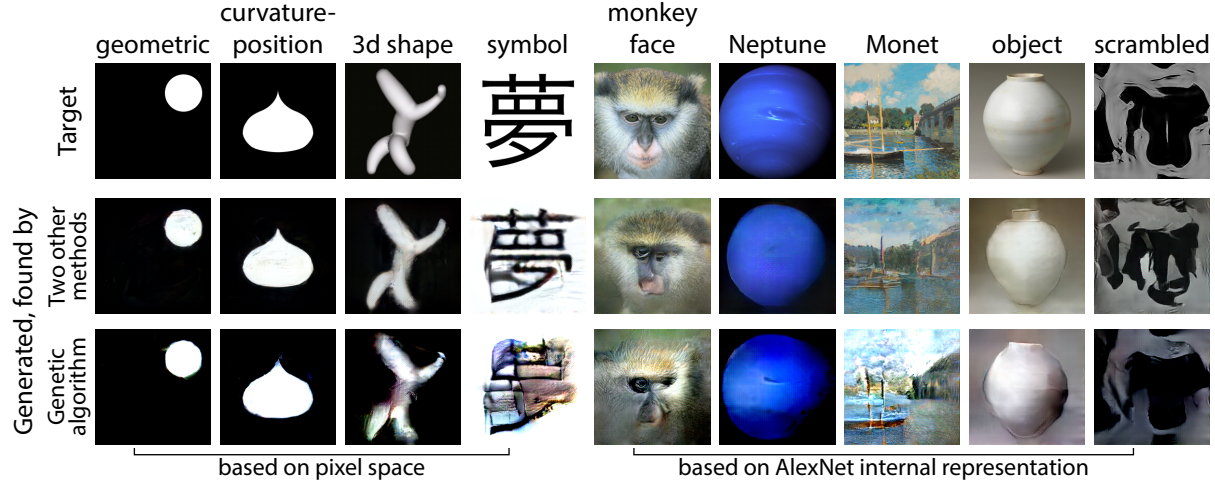

Supplement: NIHMS1527712-supplement-1.pdf [file NIHMS1527712-supplement-1.pdf]

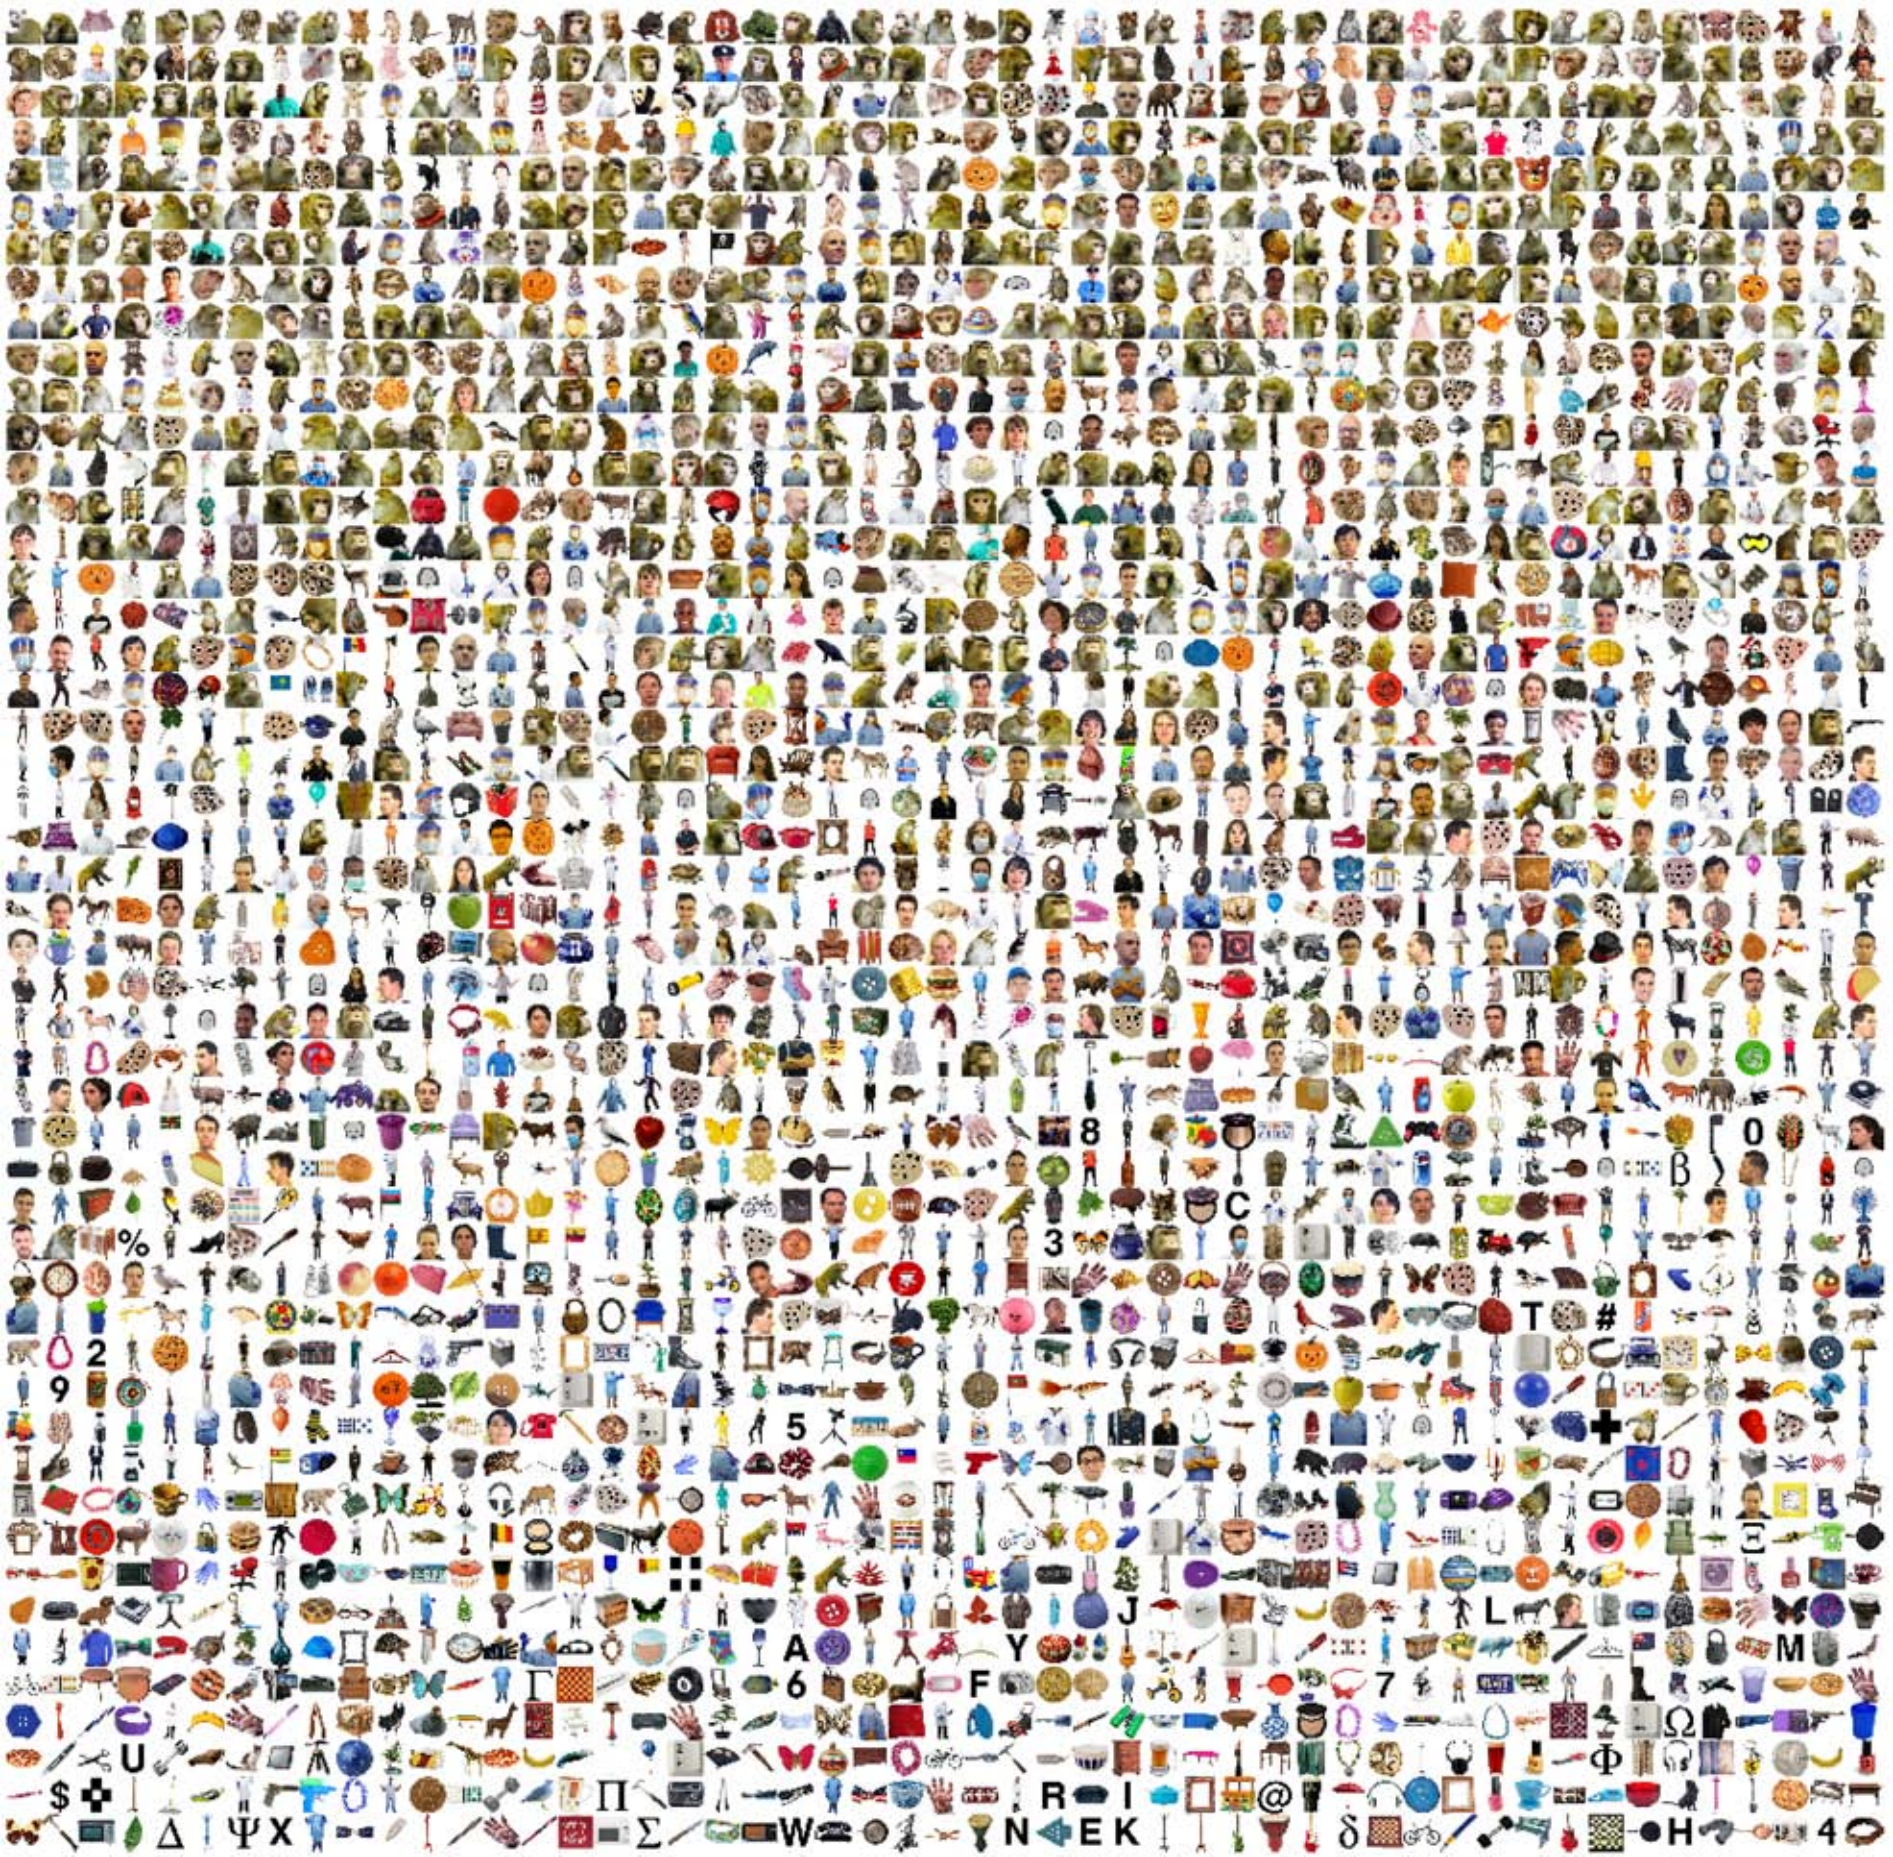

Supplement: NIHMS1527712-supplement-2.pdf [file NIHMS1527712-supplement-2.pdf]

**Evolved****Top 10 natural images**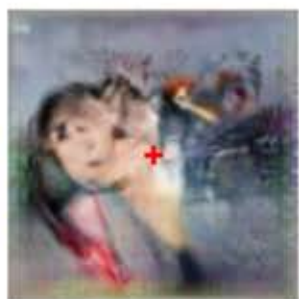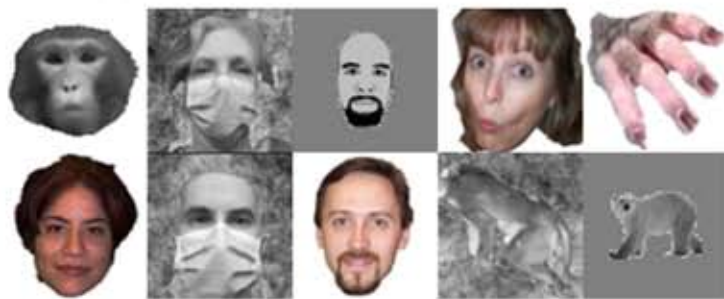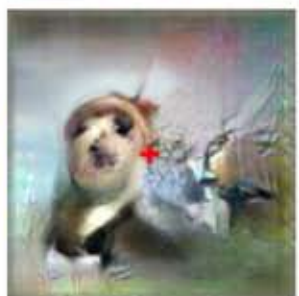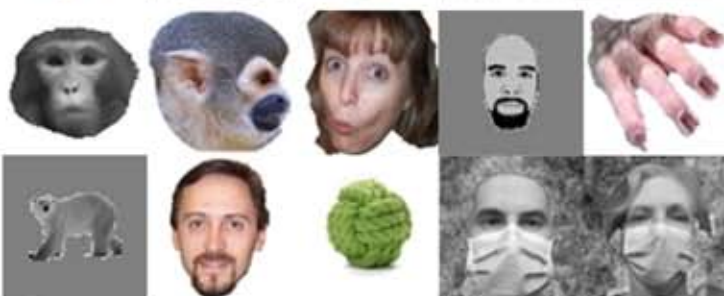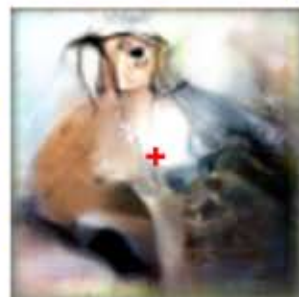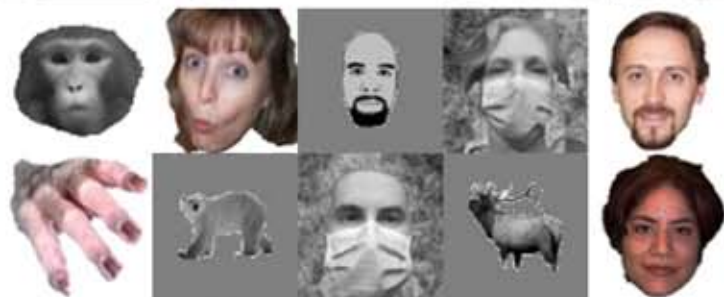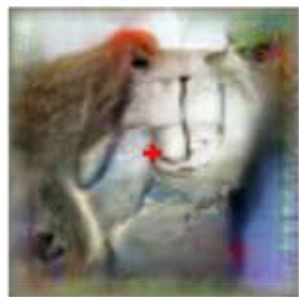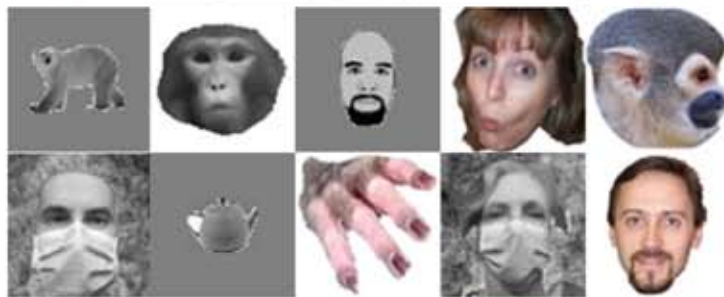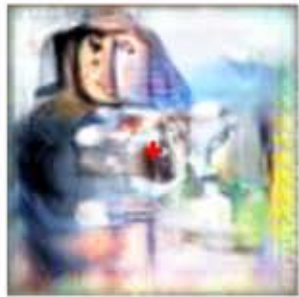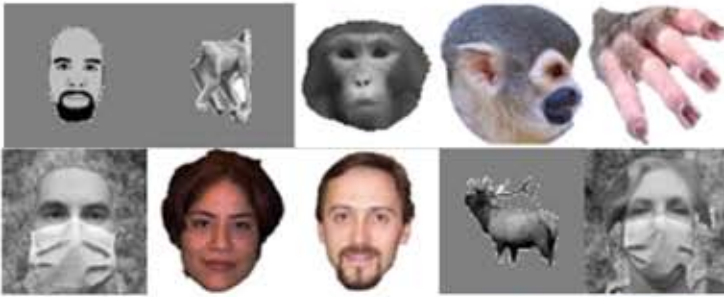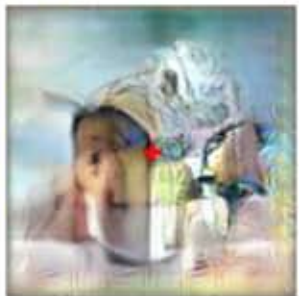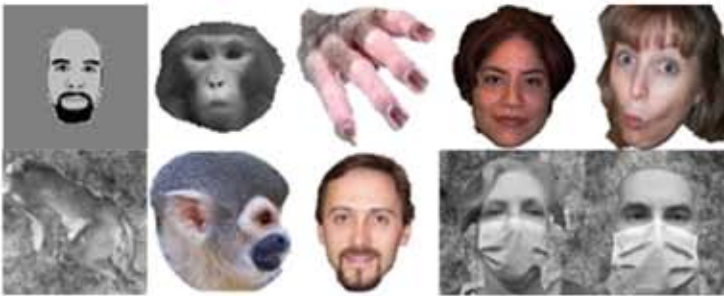**Evolved****Top 10 Natural images**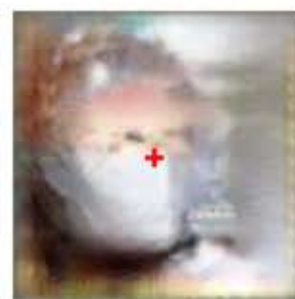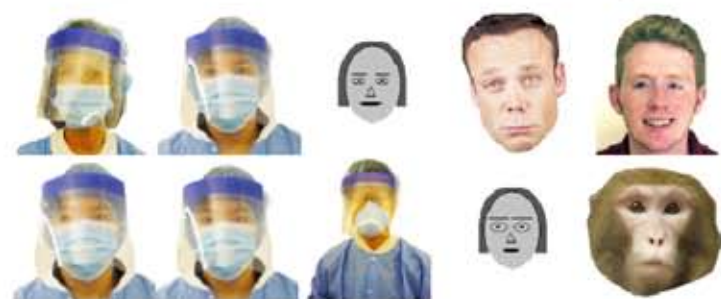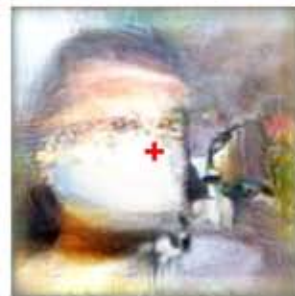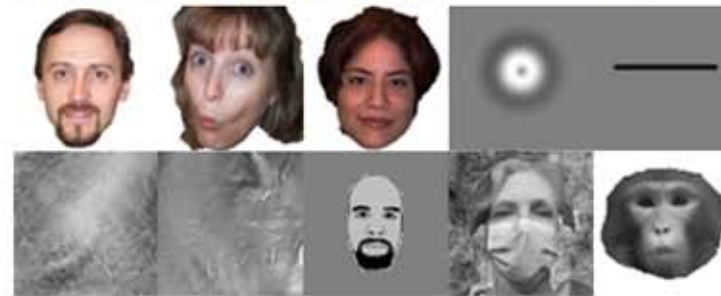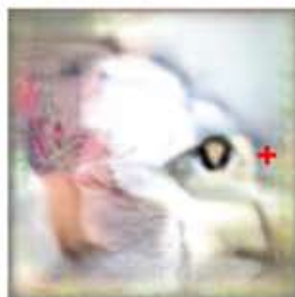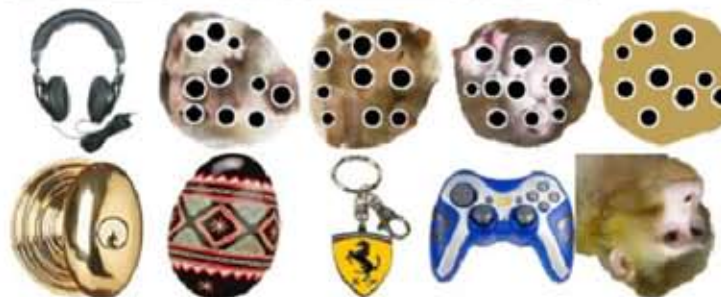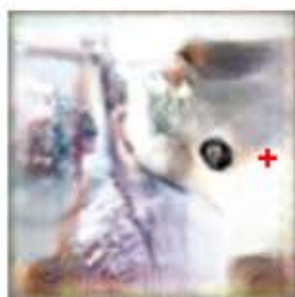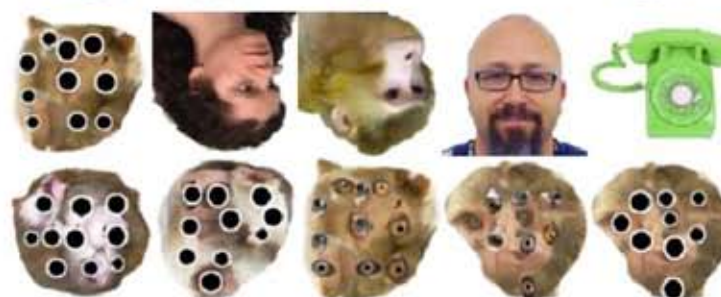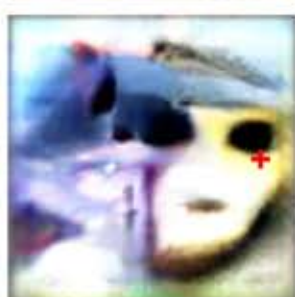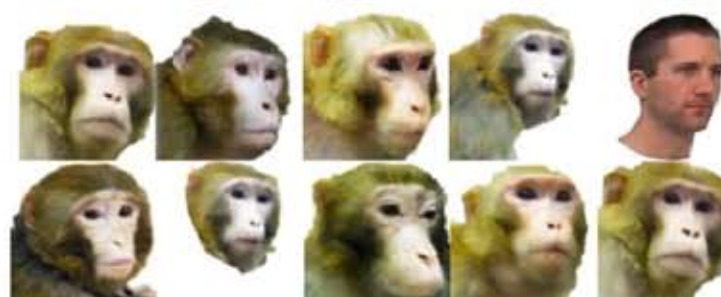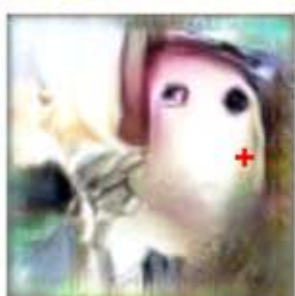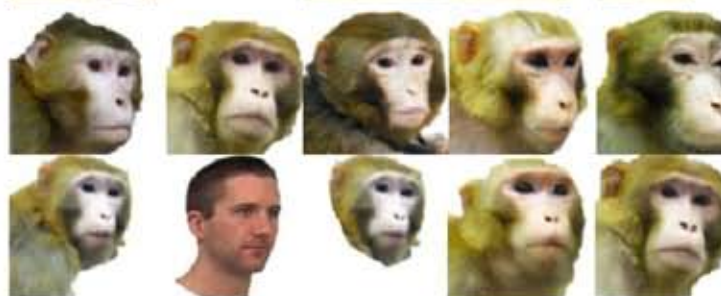**Ri-6****Ri-6****Ri-10****Ri-10****Ri-17****Ri-17****Ge-7****Ge-7****Ge-15****Ge-15****Ge-17****Ge-17**

Supplement: NIHMS1527712-supplement-3.pdf [file NIHMS1527712-supplement-3.pdf]

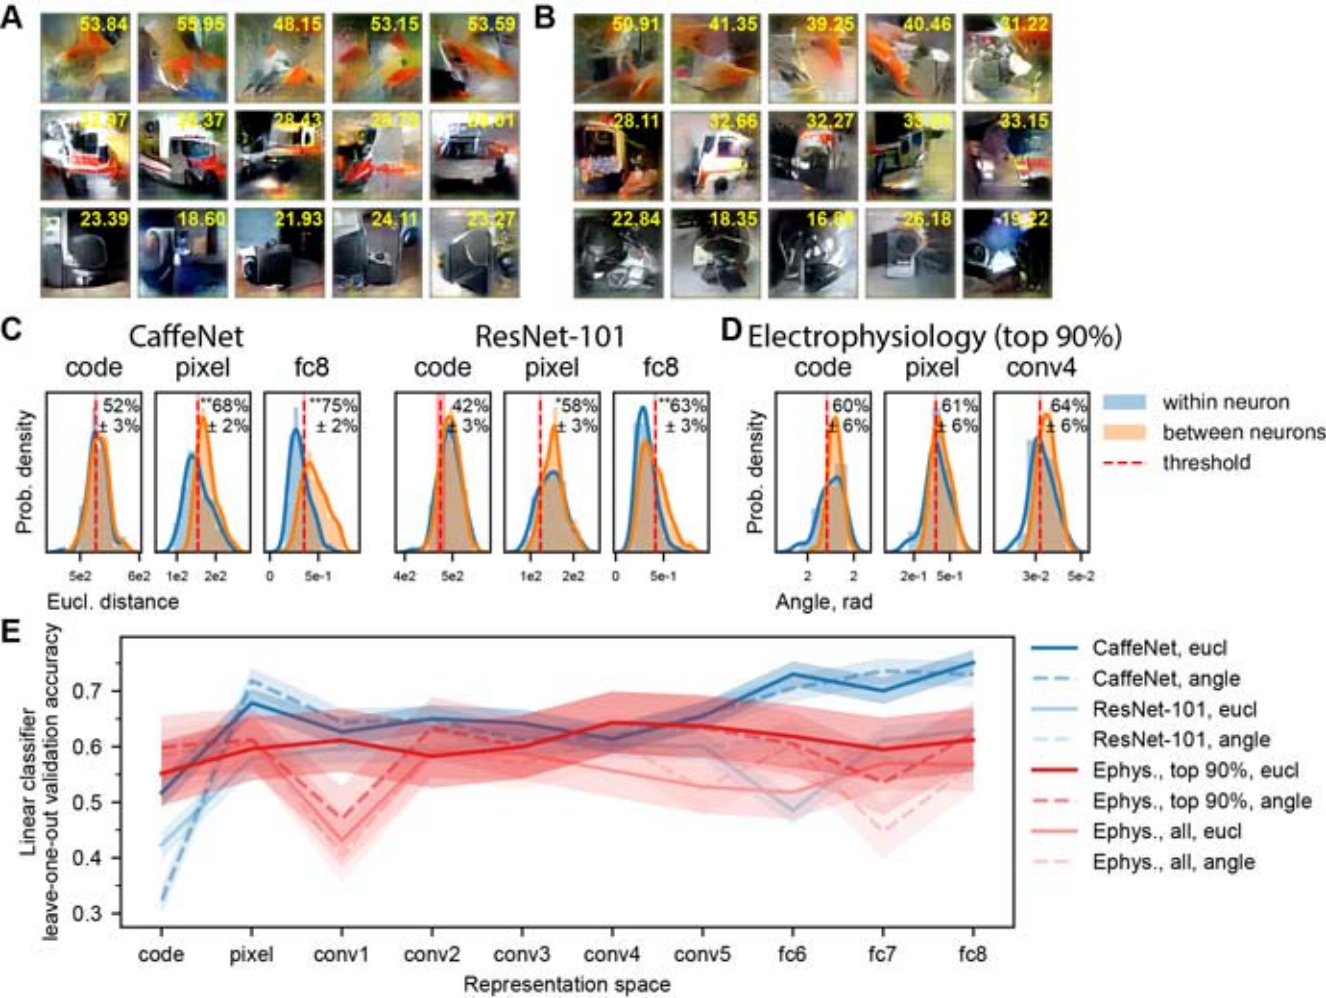

Supplement: NIHMS1527712-supplement-4.pdf [file NIHMS1527712-supplement-4.pdf]

**A**

Natural

Synthetic

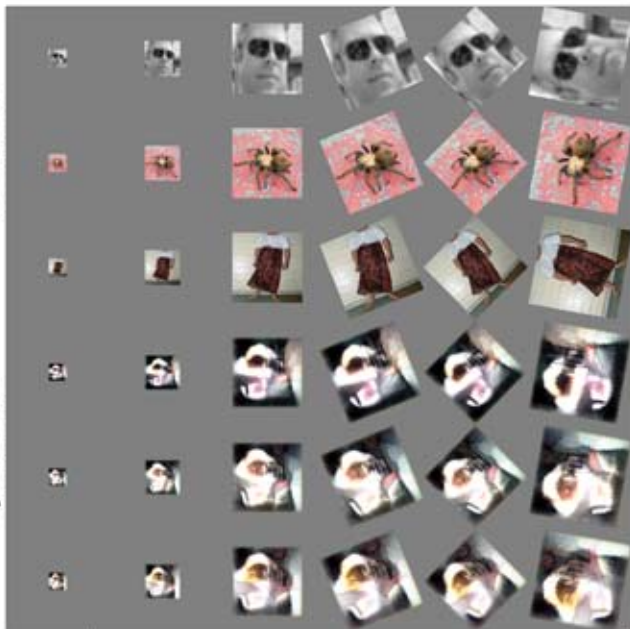**C**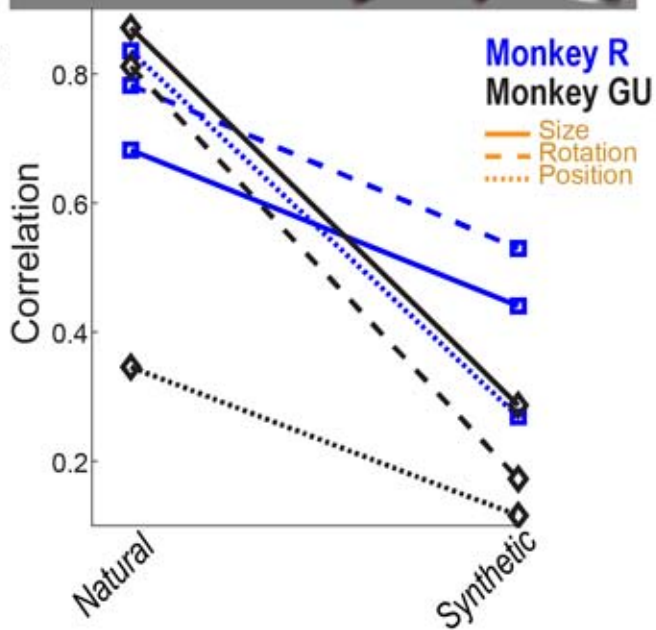**B**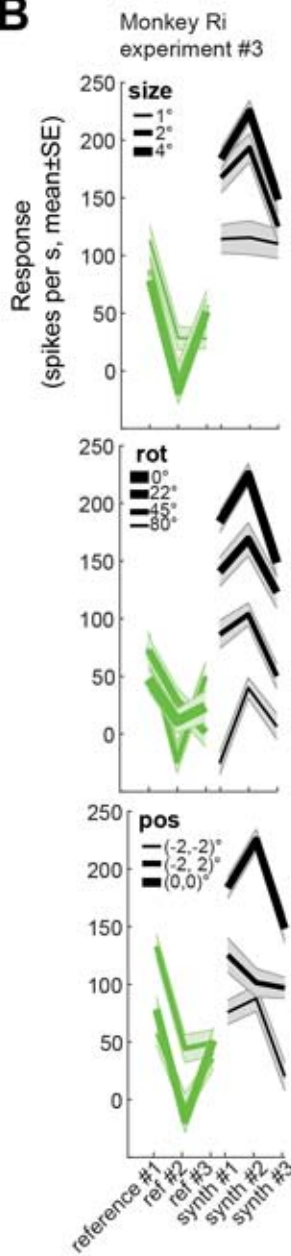

Supplement: NIHMS1527712-supplement-6.pdf [file NIHMS1527712-supplement-6.pdf]

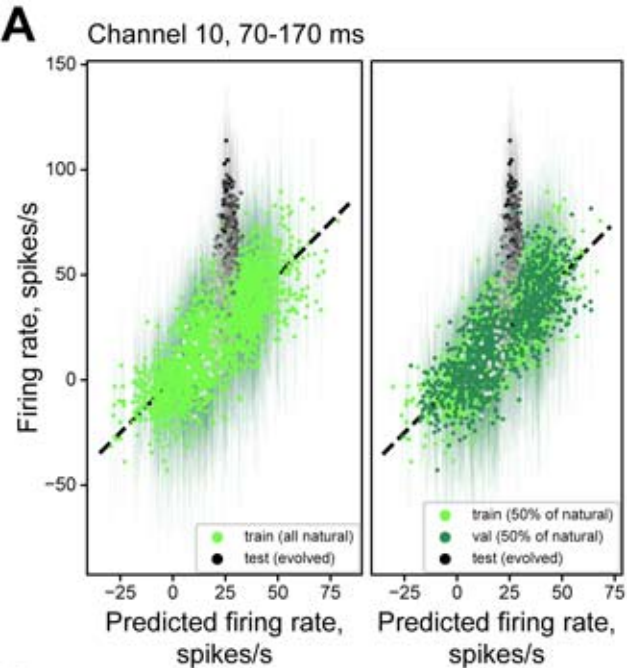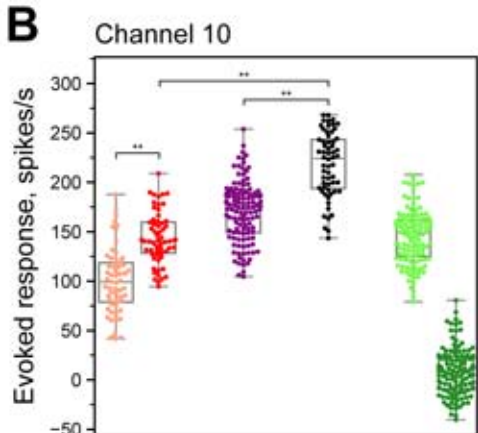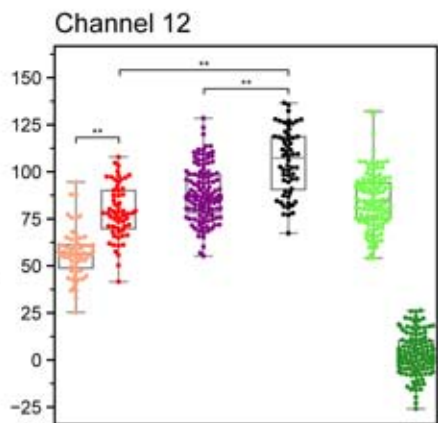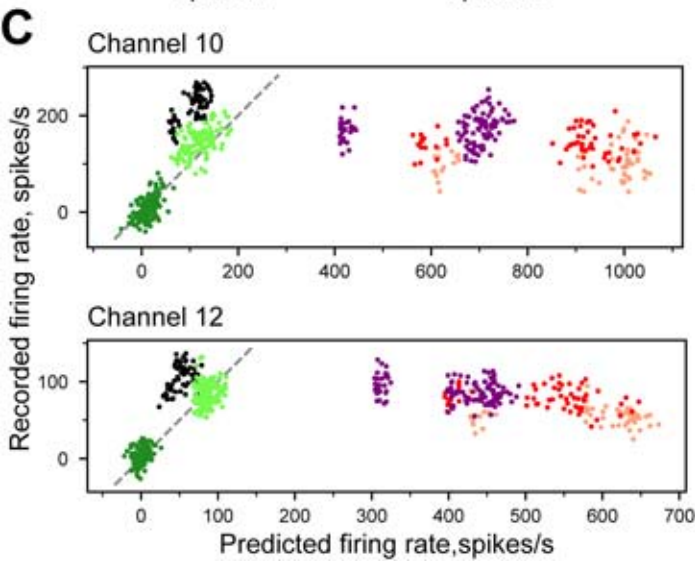

Supplement: NIHMS1527712-supplement-7.pdf [file NIHMS1527712-supplement-7.pdf]
